# Supplementary material for: Integrating Explicit and Implicit Fullerene Models into UNRES Force Field for Protein Interaction Studies
Source: MDPI journal article supplement (doi:10.3390/molecules29091919), 2024-04-23
Supplement: s1 [file s1]

Supplementary Materials for

# **Integrating Explicit and Implicit Fullerene Models into UNRES Force Field for Protein Interaction Studies**

Natalia Rogoża, Magdalena A. Krupa, Pawel Krupa\* and Adam K. Sieradzan

\*Corresponding author. Email: pkrupa@ifpan.edu.pl

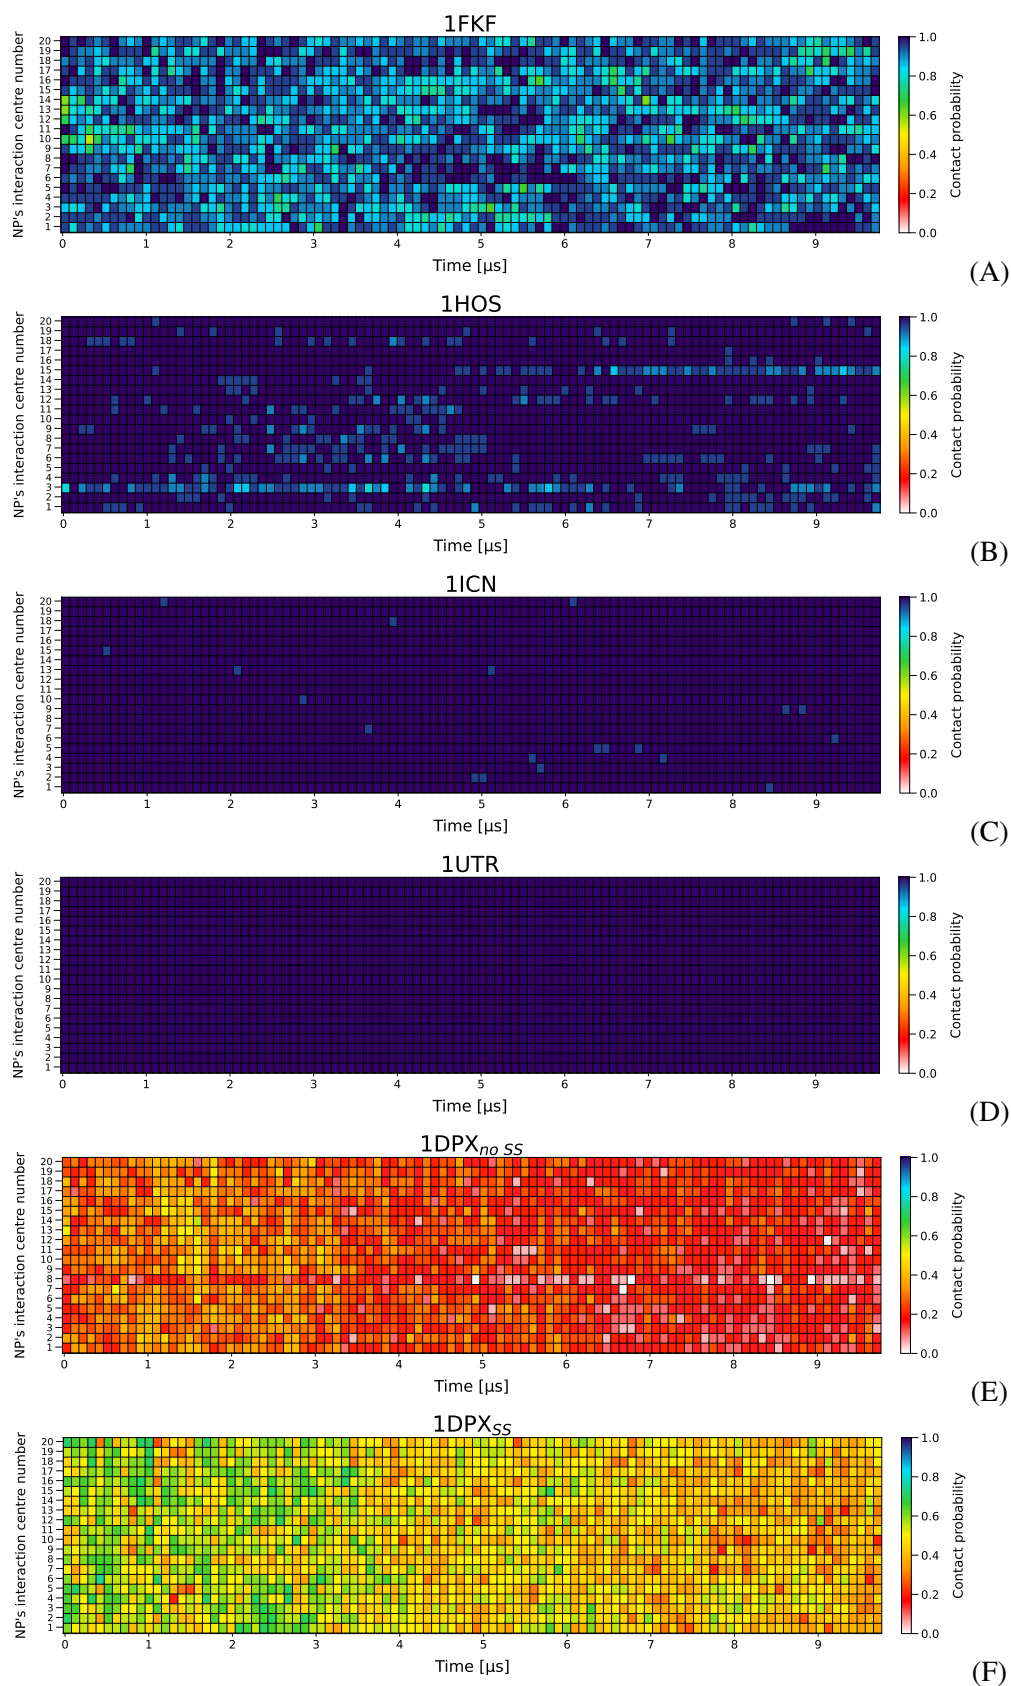

**Figure S1:** Contact probability of nanoparticle interaction centers as a function of time averaged over 20 trajectories for: (A) 1FKF, (B) 1HOS, (C) 1ICN, (D) 1UTR, (E) 1DPX<sub>no SS</sub>, and (F) 1DPX<sub>SS</sub> protein performed with UNRES force field in simulations with explicitly defined fullerene nanoparticle.

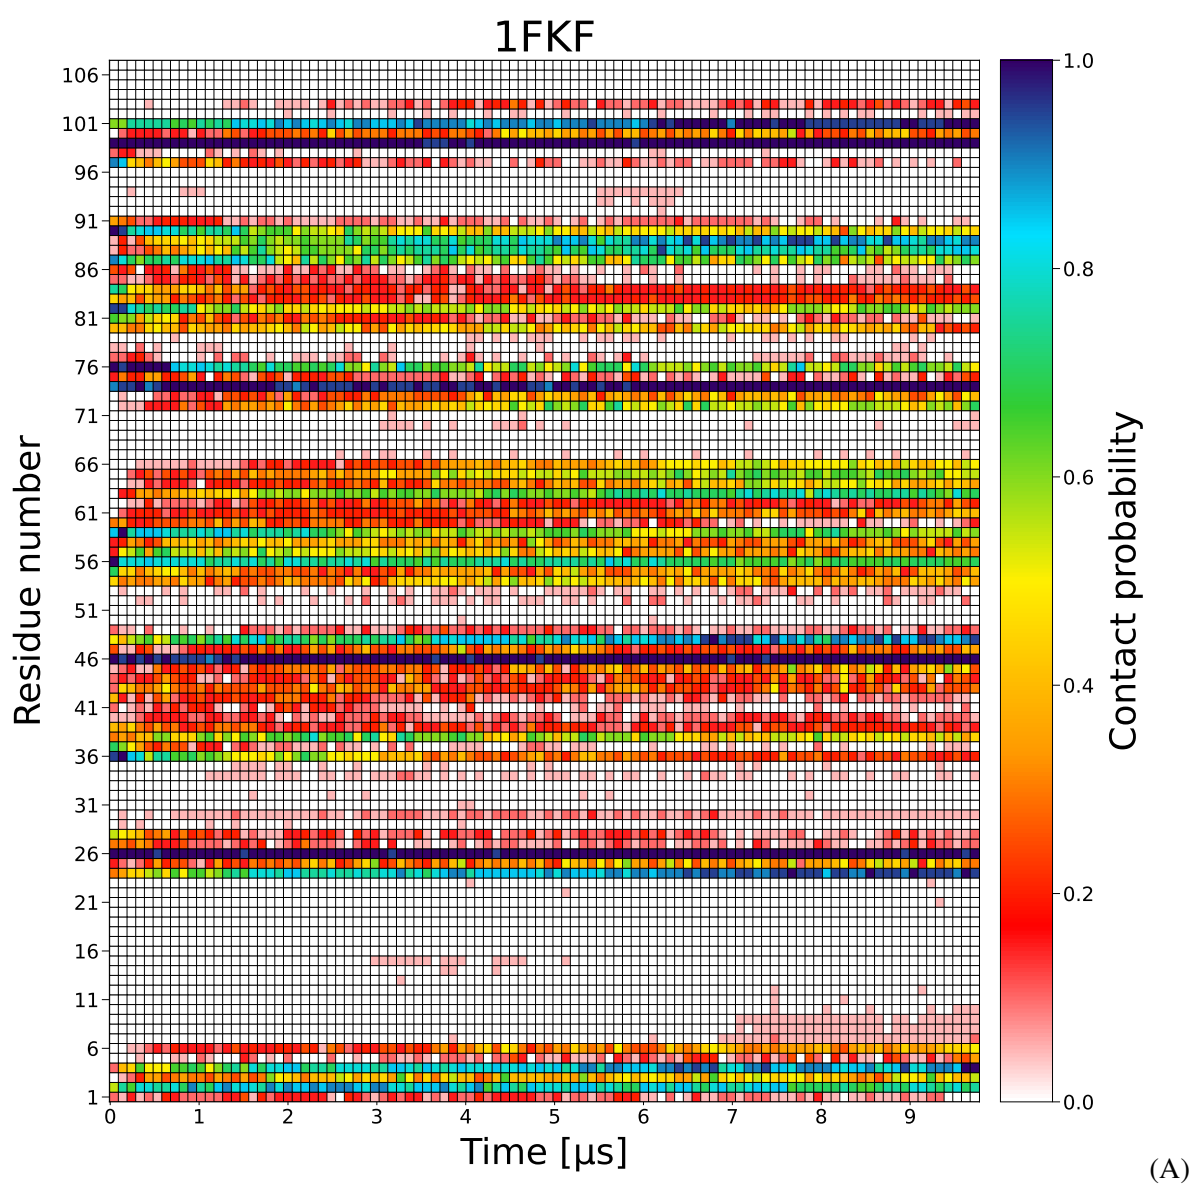

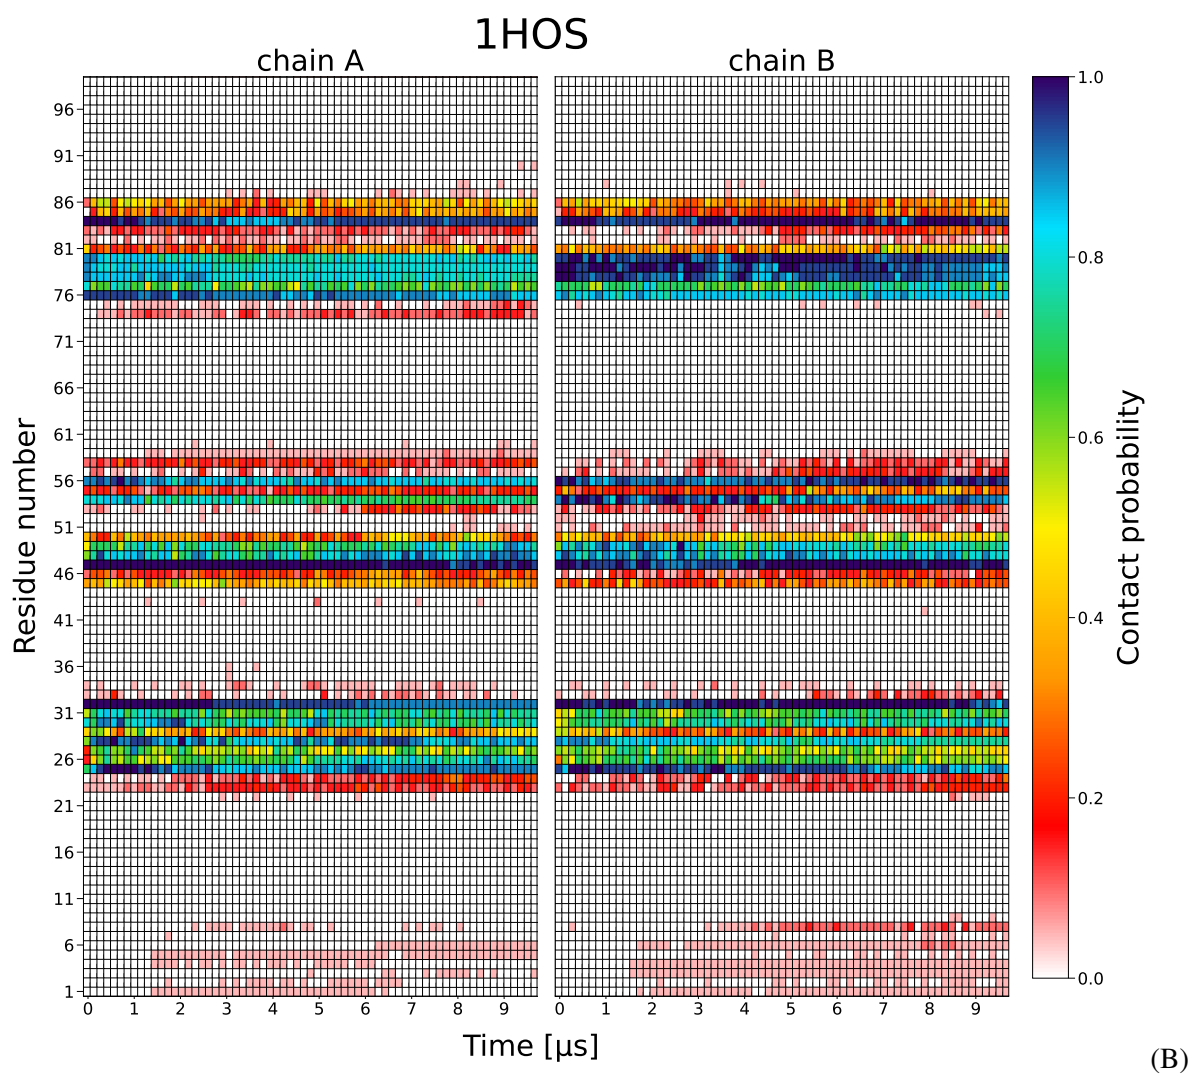

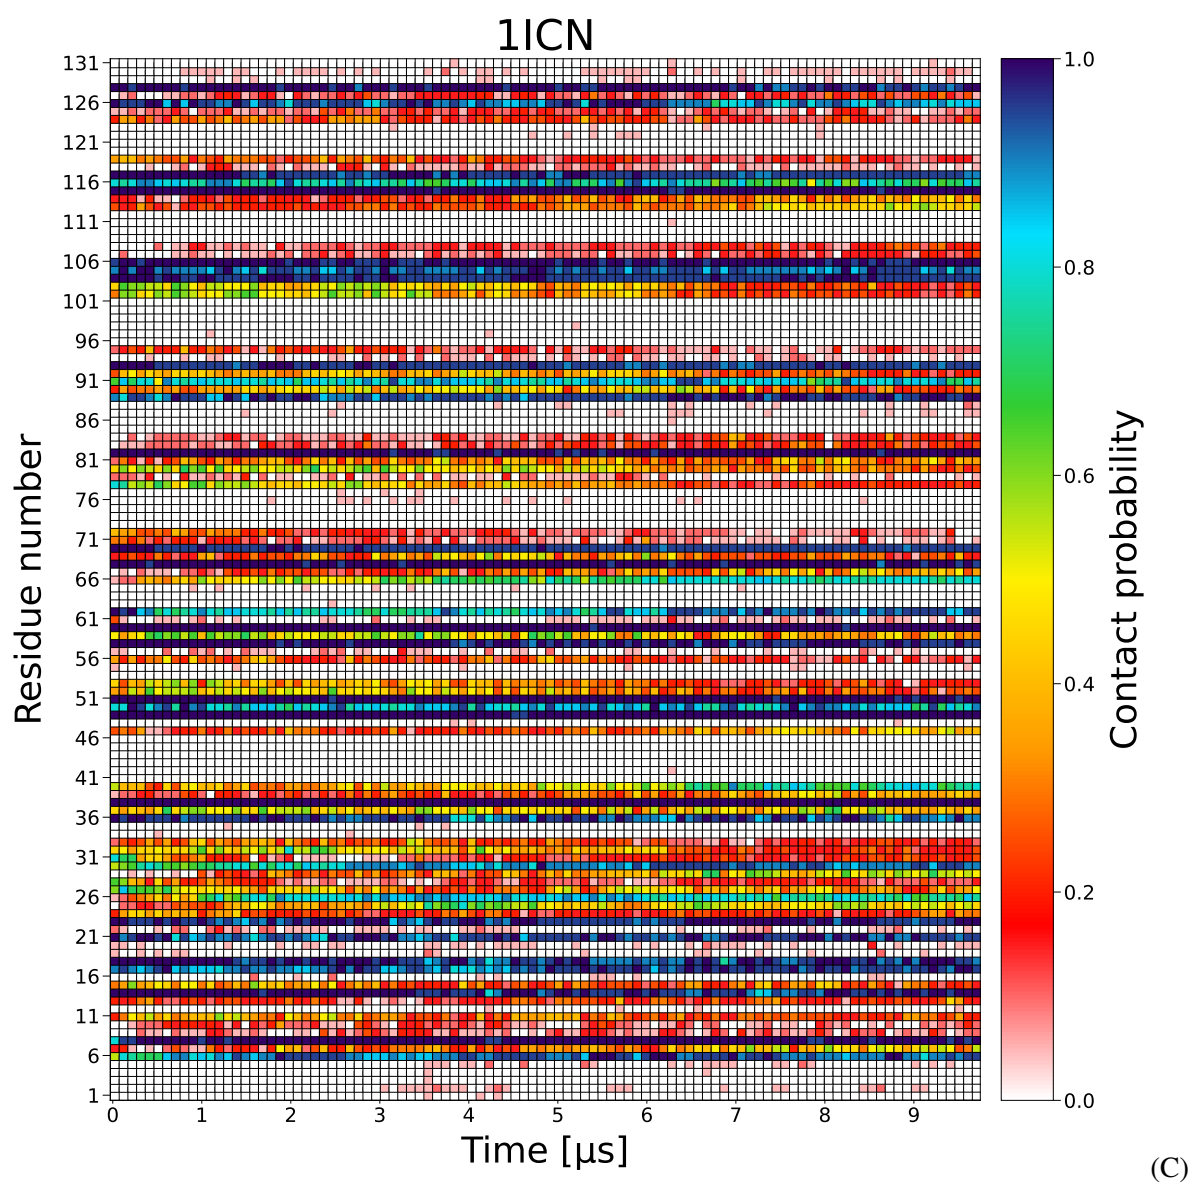

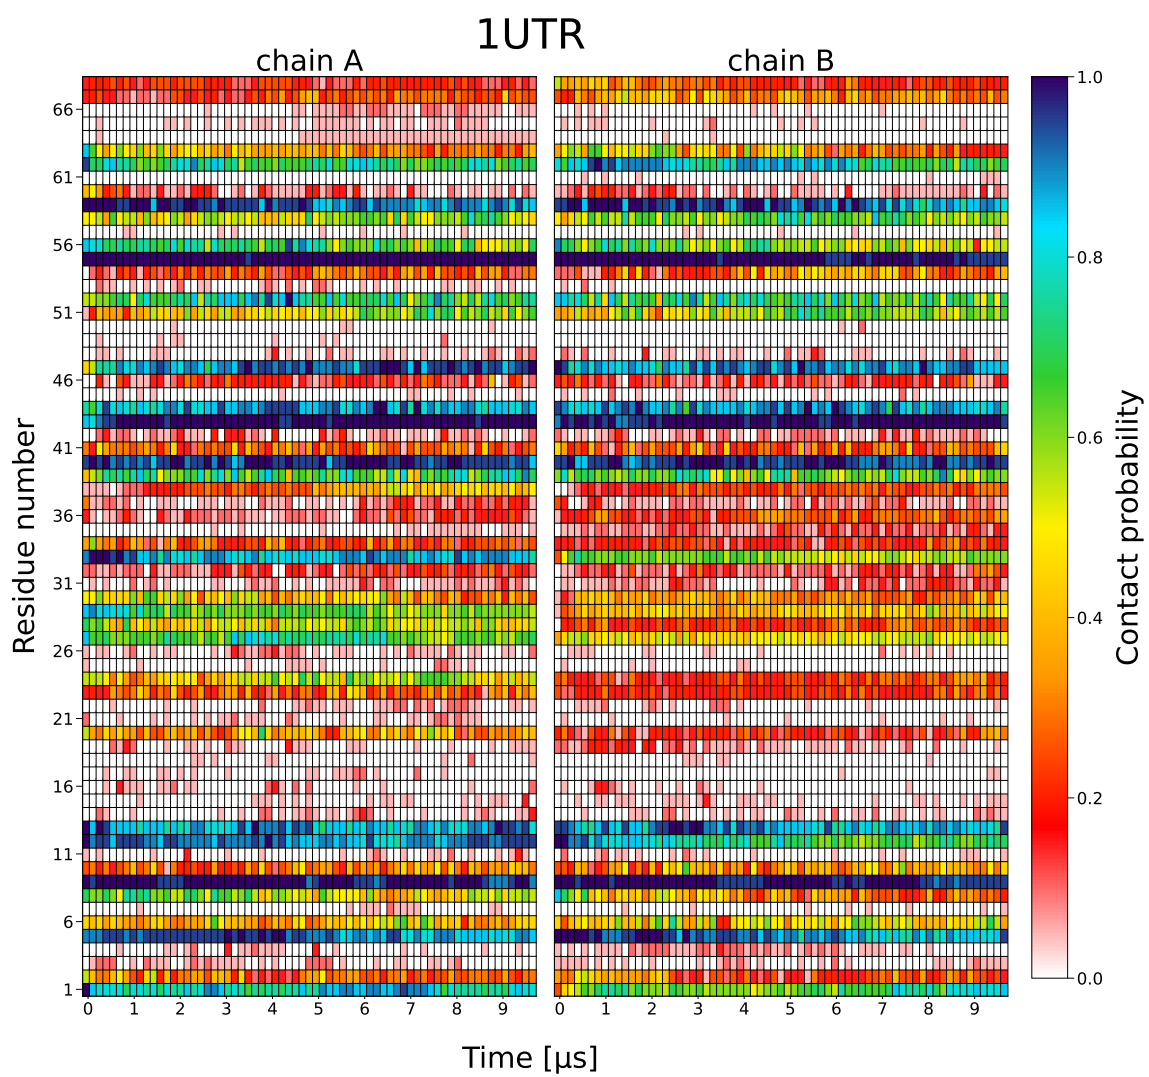

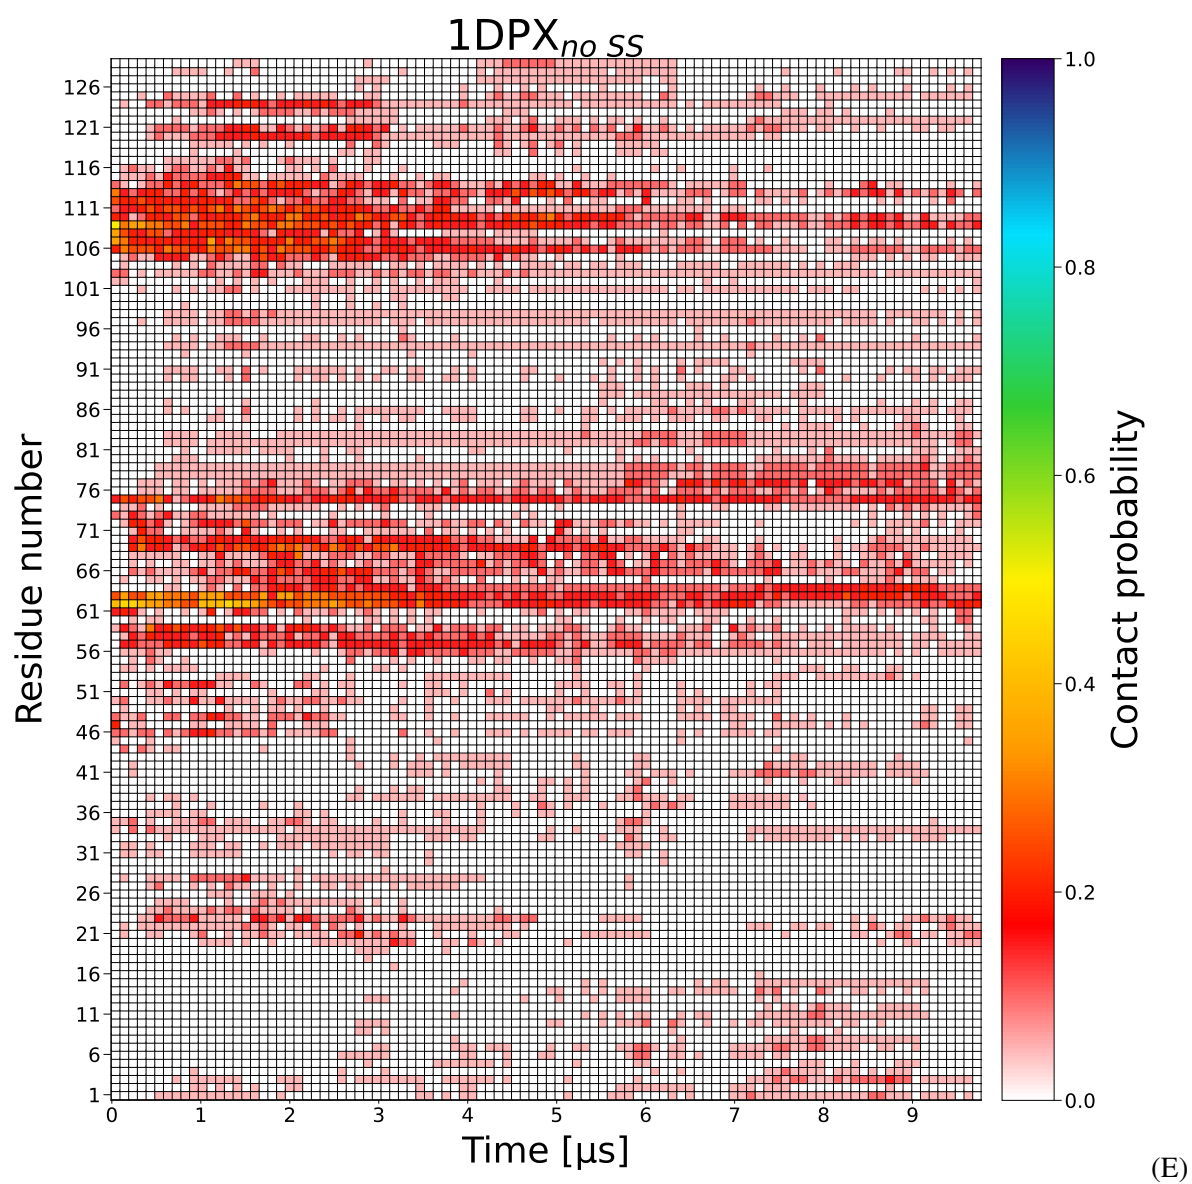

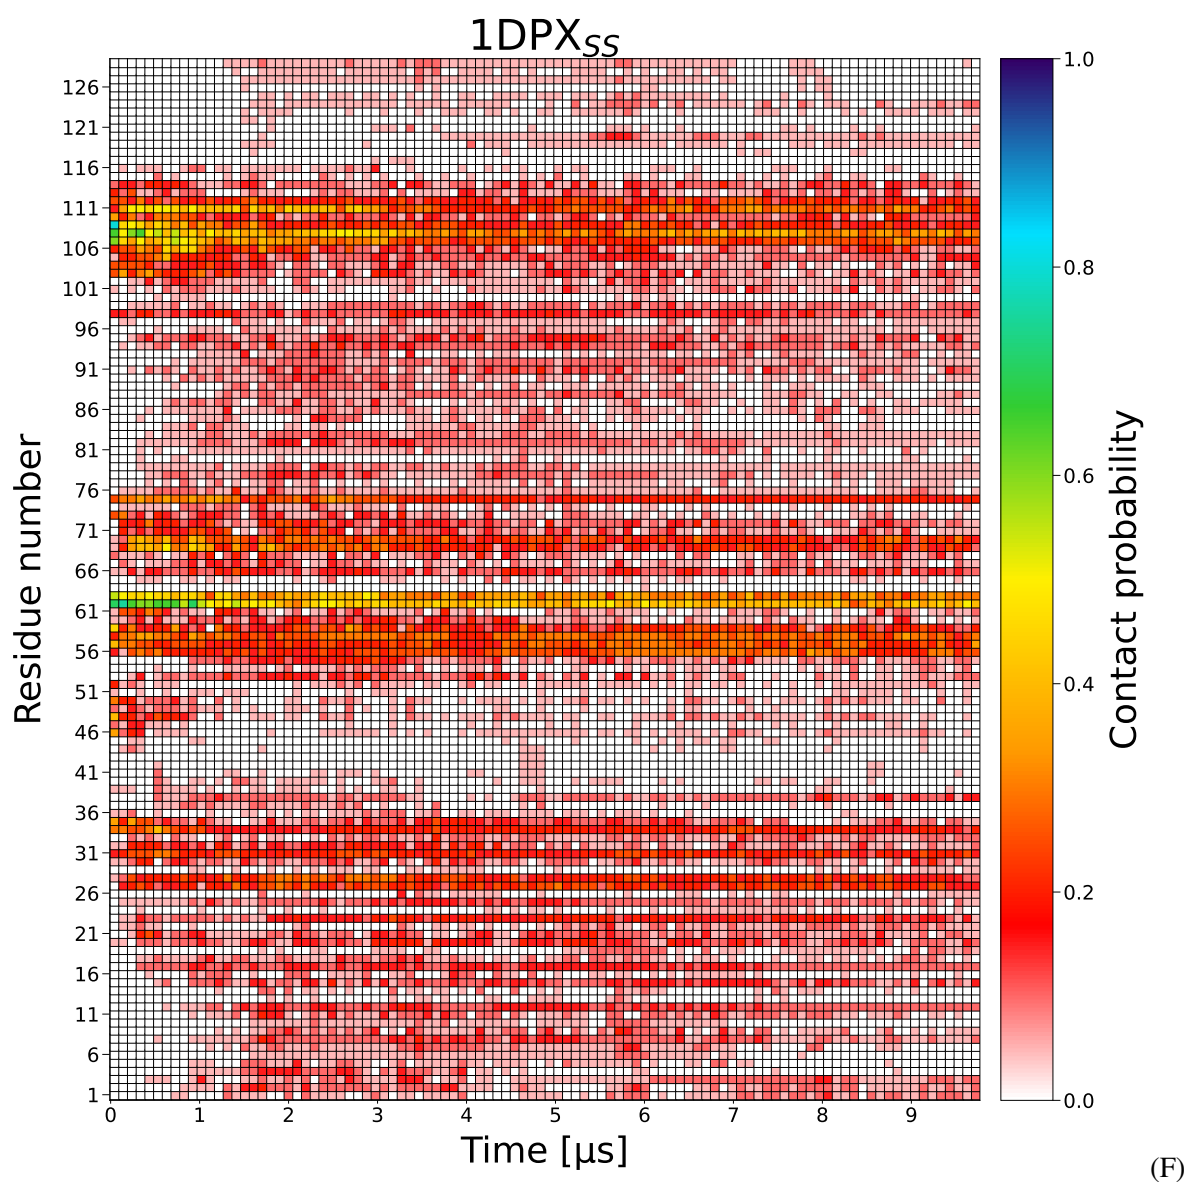

**Figure S2:** Contact probability of protein residues as a function of time averaged over 20 trajectories for (A) 1FKF, (B) 1HOS, (C) 1ICN, (D) 1UTR, (E) 1DPX<sub>no SS</sub>, and (F) 1DPX<sub>SS</sub> protein performed with UNRES force field in simulations with explicitly defined fullerene nanoparticle.



| Interaction center | Fullerene model       |              |                         |              |                |           |
|--------------------|-----------------------|--------------|-------------------------|--------------|----------------|-----------|
|                    | Implicit              |              | Explicit                |              |                |           |
|                    | $\epsilon$ [kcal/mol] | $\sigma$ [Å] | $\epsilon_0$ [kcal/mol] | $\sigma$ [Å] | $\sigma_0$ [Å] | $\chi_0'$ |
| Peptide group      | 1.197                 | 5.367        | -1.500                  | 4.000        | *              | *         |
| Cys                | 1.553                 | 5.644        | 5.264                   | 2.675        | 4.927          | 0.870     |
| Met                | 1.668                 | 5.668        | 5.486                   | 2.734        | 5.105          | 1.054     |
| Phe                | 1.661                 | 5.938        | 5.291                   | 2.966        | 4.207          | 0.939     |
| Ile                | 1.742                 | 5.863        | 5.884                   | 2.882        | 4.851          | 1.026     |
| Leu                | 1.731                 | 5.995        | 5.671                   | 3.021        | 2.785          | 1.083     |
| Val                | 1.632                 | 5.832        | 5.551                   | 2.841        | 3.583          | 1.054     |
| Trp                | 1.535                 | 5.496        | 4.757                   | 2.477        | 7.866          | 0.789     |
| Tyr                | 1.360                 | 5.394        | 4.163                   | 2.461        | 7.430          | 0.899     |
| Ala                | 1.322                 | 5.437        | 4.386                   | 2.465        | 1.963          | 1.003     |
| Gly                | 1.197                 | 5.367        | 3.652                   | 2.493        | 0.799          | 1.243     |
| Thr                | 1.033                 | 5.544        | 3.025                   | 2.573        | 4.058          | 0.893     |
| Ser                | 0.985                 | 5.378        | 2.568                   | 2.456        | 1.889          | 0.917     |
| Gln                | 0.975                 | 5.400        | 2.500                   | 2.484        | 3.198          | 1.616     |
| Asn                | 0.902                 | 5.418        | 2.139                   | 2.489        | 3.267          | 1.432     |
| Glu                | 0.770                 | 5.468        | 1.471                   | 2.509        | 2.685          | 2.050     |
| Asp                | 0.755                 | 5.469        | 1.737                   | 2.508        | 2.004          | 1.420     |
| His                | 1.198                 | 5.347        | 3.105                   | 2.422        | 6.244          | 0.993     |
| Arg                | 0.968                 | 5.297        | 2.015                   | 2.271        | 8.196          | 1.432     |
| Lys                | 0.921                 | 5.375        | 1.820                   | 2.452        | 13.475         | 27.495    |
| Pro                | 1.121                 | 5.672        | 3.640                   | 2.703        | 2.663          | 0.779     |

**Table S1:**  $\epsilon$  and  $\sigma$  parameters used for Kihara potential for nanoparticle in implicit form and the Gay-Berne potential parameters  $\epsilon$  and  $\sigma_0$  ( $\sigma_i$ ) of individual residue  $i$  and  $\chi'$ , where  $\sigma_0$ , ( $\sigma$ ) is distance corresponding to the 0 value of  $E_{Gay-Berne}$  at side-to-side (head-to-head) orientation from which  $\chi$  is computed. \* peptide group interact through LJ potential, negative  $\epsilon_0$  value indicate that both 6 and 12 terms are repulsive

To compute  $\sigma$  (or  $\sigma_0$ ) a transformation is applied  $\sigma_{ij} = \sqrt{\sigma_i^2 + \sigma_j^2}$ . Therefore, for nanoparticle  $\sigma_{nano,j} = \sqrt{\sigma_{Ala}^2 + \sigma_j^2}$ . To transform  $\chi_0'$  to  $\chi'$  a given equation is used:  

$$\chi' = (\chi_0' - 1)/(\chi_0' + 1)$$

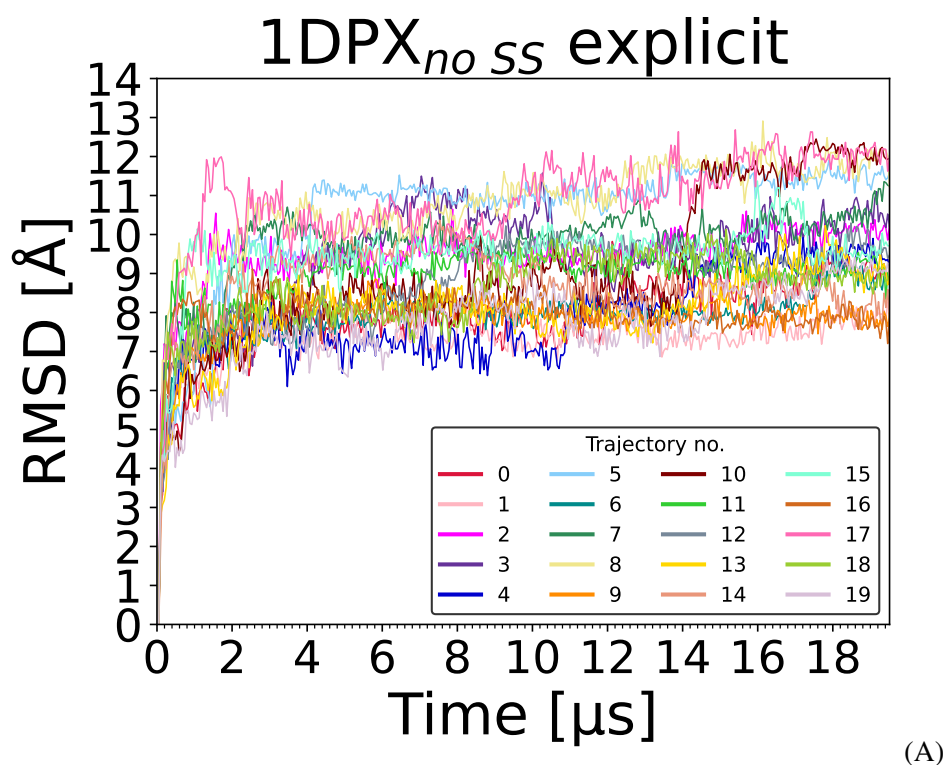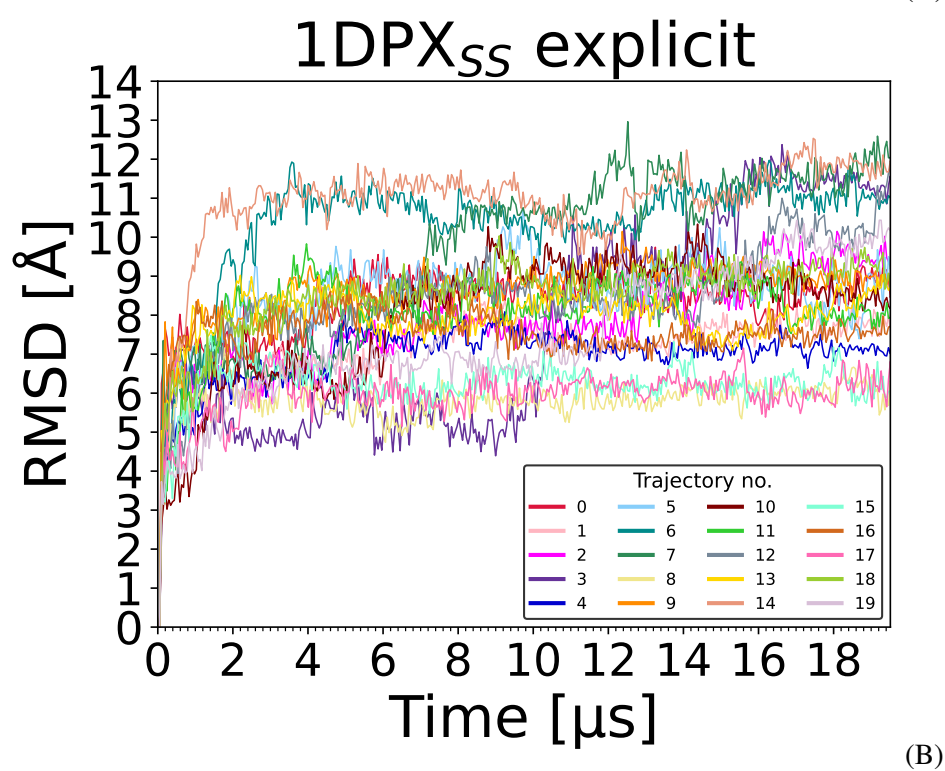

**Figure S3:** RMSD values over time for each of 20 trajectory in explicit simulations for (A) 1DPX<sub>no SS</sub> and (B) 1DPX<sub>SS</sub> protein performed with UNRES force field.
